# Supplementary material for: <em>Salmonella typhimurium </em>Alteration of Small Intestine Metabolism Early after Infection Is Linked to Microbiome Changes
Source: Preprints.org preprint supplement (doi:10.20944/preprints202402.0353.v1), 2024-02-06
Supplement: Supplementary file 3 [file supplementary]

## Sheet: Table_1
												Metabolite	Group	Abundance		P-vaue
Metabolite	Group	P-vaue	Control 1	Control 2	Control 3	Mean_control	Infected 1	Infected 2	Infected 3	Mean_infected				Mean control	Mean infected
Asparagine	Amino acids	<0.05	83680.5	623287	40992	249320	27277	36978.5	28705	30986.8		Asparagine	Aminoacids	249320	30986.8	<0.05
Leucine	Amino acids	<0.01	135835	111100	421482	222805	1208022	688130	6543387	2.81318e+06		Leucine	Aminoacids	222805	2.81318e+06	<0.01
Phenylalanine	Amino acids	<0.01	21584	9273	1061.5	10639.5	7727	1930	3744	4467		Phenylalanine	Aminoacids	10639.5	4467	<0.01
Serine	Amino acids	<0.01	35138	31009	31339	32495.3	31101	551338	1.2682e+06	616879		Serine	Aminoacids	32495.3	616879	<0.01
Tyrosine	Amino acids	<0.01	16727.5	2447.5	4257	7810.67	42636.5	49329.5	93896.5	61954.2		Tyrosine	Aminoacids	7810.67	61954.2	<0.01
Arginine	Amino acids	<0.01	1049.3	1248.41	4163.49	2153.73	16368.5	21851.7	126780	54999.9		Arginine	Aminoacids	2153.73	54999.9	<0.01
Creatine	Amino acids	<0.01	18364.8	4168.63	14502.1	12345.2	34183.3	100371	70743.4	68432.6		Creatine	Aminoacids	12345.2	68432.6	<0.01
Decenoylcarnitine	Amino acids	<0.01	11483.8	5046.03	3636.97	6722.27	2379.27	2157.88	2597.74	2378.29		Decenoylcarnitine	Aminoacids	6722.27	2378.29	<0.01
GCDCA	Bile acids	<0.05	1858.33	2034.21	10155.1	4682.55	1971.54	368.756	2251	1530.43		GCDCA	Bile acids	4682.55	1530.43	<0.05
Glycocholic acid	Bile acids	<0.01	18137.4	11625.9	588920	206228	1.47933e+06	18374.4	736858	744853		Glycocholic acid	Bile acids	206228	744853	<0.01
Taurocholic acid	Bile acids	<0.05	21304.1	12429.5	185371	73035	241148	47798.8	224211	171053		Taurocholic acid	Bile acids	73035	171053	<0.05
Tocopherol acetate	Bile acids	<0.05	154739	149369	83868.4	129325	63779.2	55170.9	55557.4	58169.2		Tocopherol acetate	Bile acids	129325	58169.2	<0.05
Fumaric acid	Carboxilic acids	<0.01	144385	95914.5	55499	98599.5	31109	19641	21361	24037		Fumaric acid	Carboxilic acids	98599.5	24037	<0.01
Pantothenic acid	Carboxilic acids	<0.01	1741.02	326.926	2049.65	1372.53	4422.17	7536.1	8063.44	6673.91		Pantothenic acid	Carboxilic acids	1372.53	6673.91	<0.01
Aconitic acid	Carboxylic acids	<0.05	94357.5	54789	26865.5	58670.7	19797.5	20940.5	26766.5	22501.5		Aconitic acid	Carboxylic acids	58670.7	22501.5	<0.05
Pyruvic acid	Carboxylic acids	<0.01	7913	10187	5056.5	7718.83	2186	1365.5	3386	2312.5		Pyruvic acid	Carboxylic acids	7718.83	2312.5	<0.01
Succinic_acid	Carboxylic acids	<0.01	22990	15003.5	20605.5	19533	18979.5	17772.5	39321.5	25357.8		Succinic_acid	Carboxylic acids	19533	25357.8	<0.01
Acetylcarnitine	Carnitines	<0.01	12429.7	11997.4	16398.5	13608.5	27704.8	97221.6	42536.9	55821.1		Acetylcarnitine	Carnitines	13608.5	55821.1	<0.01
Carnitine	Carnitines	<0.01	22266.5	18945.1	21009.9	20740.5	30649.6	68175.5	46604.1	48476.4		Carnitine	Carnitines	20740.5	48476.4	<0.01
Propionylcarnitine	Carnitines	<0.05	9732.17	16062.9	8981.13	11592.1	16890.7	88499.7	35578.9	46989.8		Propionylcarnitine	Carnitines	11592.1	46989.8	<0.05
Acetoacetic acid	Fatty acids	<0.01	56857	46170.5	90262	64429.8	438702	223118	2.02386e+06	895226		Acetoacetic acid	Fatty acids	64429.8	895226	<0.01
Butyrate	Fatty acids	<0.01	182645	143754	1.04182e+06	456074	1.59577e+06	453334	2568197	1.5391e+06		Butiric	Fatty acids	456074	1.5391e+06	<0.01
Oxovaleric acid	Fatty acids	<0.01	1.04357e+06	525288	5966097	2511650	6997420	5658449	15739679	9.46518e+06		Oxovaleric acid	Fatty acids	2511650	9.46518e+06	<0.01
Methylvaleric acid	Fatty acids	<0.05	6082	6849	6765.5	6565.5	10608.5	7354.5	12970	10311		Methylvaleric acid	Fatty acids	6565.5	10311	<0.05
Caprilic acid	Fatty acids	<0.05	196746	166340	327522	230203	525670	563696	750134	613166		Caprilic acid	Fatty acids	230203	613166	<0.05
Linoleic acid	Fatty acids	<0.01	53023.1	41853.7	50597.9	48491.6	43144.7	33094.2	30292.5	35510.4		Linoleic acid	Fatty acids	48491.6	35510.4	<0.01
Stearic acid	Fatty acids	<0.01	3918.66	19293.3	2592.15	8601.39	314.472	263.906	2750.17	1109.51		Stearic acid	Fatty acids	8601.39	1109.51	<0.01
Behenic acid	Fatty acids	<0.01	65613.5	30227.2	28935.6	41592.1	9838.63	5058.92	3467.81	6121.78		Behenic acid	Fatty acids	41592.1	6121.78	<0.01
HODE_1	Fatty acids	<0.01	15176.3	121144	19330.8	51883.8	1827.13	1830.28	5257.72	2971.71		HODE_1	Fatty acids	51883.8	2971.71	<0.01
HODE_2	Fatty acids	<0.01	2644.62	5320.43	2987.47	3650.84	6813.82	3714.46	25500.4	12009.6		HODE_2	Fatty acids	3650.84	12009.6	<0.01
Hypoxanthine	Others	<0.01	41162	46160.5	25630	37650.8	59753	275267	283816	206278		Hypoxanthine	Others	37650.8	206278	<0.01
Choline	Others	<0.01	989470	2.5511e+06	1.44886e+06	1.66314e+06	3.54038e+06	5.16057e+06	2289844	3.6636e+06		Choline	Others	1.66314e+06	3.6636e+06	<0.01
Quinoline	Others	<0.01	18928.9	113442	38784.5	57051.7	2032.61	2572.13	2893.54	2499.43		Quinoline	Others	57051.7	2499.43	<0.01
Sphinganine	Others	<0.01	714767	791195	1.50281e+06	1.00292e+06	66609	697332	759817	507919		Sphinganine	Others	1.00292e+06	507919	<0.01
Sphingosine	Others	<0.01	8579.91	53964.2	27980.3	30174.8	214780	139816	166297	173631		Sphingosine	Others	30174.8	173631	<0.01
Stearoylethanolamide	Others	<0.01	5698.16	5844.67	6605.69	6049.51	2188.96	3791.19	4378	3452.72		Stearoylethanolamide	Others	6049.51	3452.72	<0.01
Glycericacid	Sugar derivates	<0.05	45371	21806.5	64203	43793.5	65237.5	57676	106776	76563.3		Glycericacid	Sugar derivates	43793.5	76563.3	<0.05
Glycerol	Sugar derivates	<0.01	10788	19791	9081	13220	396	3411	6019	3275.33		Glycerol	Sugar derivates	13220	3275.33	<0.01
Mannitol	Sugar derivates	<0.01	64796	71854	168130	101594	505248	214364	2.19425e+06	971286		Mannitol	Sugar derivates	101594	971286	<0.01
